# Supplementary material for: Development and Multicentric Validation of a Lateral Flow Immunoassay for Rapid Detection of MCR-1-Producing Enterobacteriaceae
Source: PubMed Central journal article supplement (PMC6498016; doi:10.1128/jcm.01454-18), 2019-04-26
Supplement: JCM.01454-18-s0001.pdf [file JCM.01454-18-s0001.pdf]

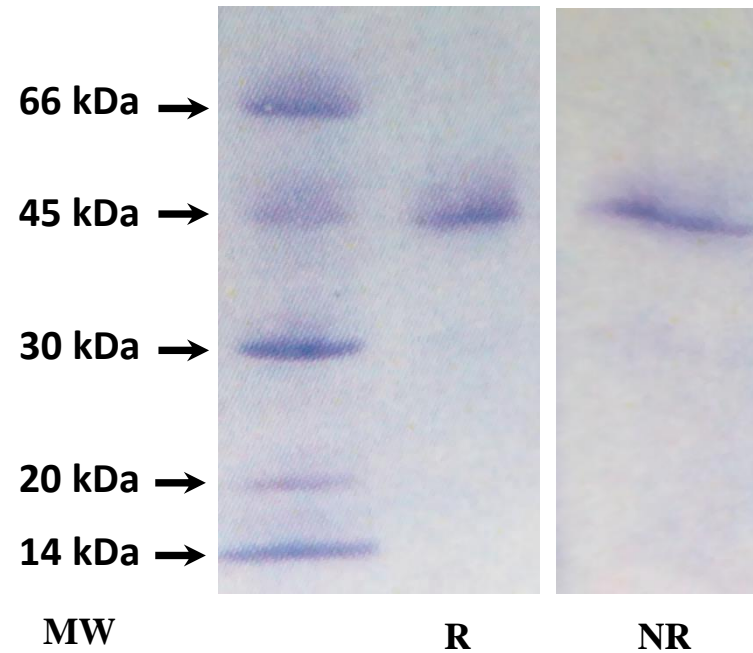

**Supplemental Figure 1:** SDS-PAGE (Pharmacia Phast system). Purified recombinant MCR-1 (0,34 mg/mL), Coomassie blue staining. MW = molecular weight, NR = non-reducing conditions, R = reducing conditions. (Same gel spliced to avoid the presence of other samples)
