# Supplementary material for: Development and Multicentric Validation of a Lateral Flow Immunoassay for Rapid Detection of MCR-1-Producing Enterobacteriaceae
Source: PubMed Central journal article supplement (PMC6498016; doi:10.1128/jcm.01454-18), 2019-04-26
Supplement: JCM.01454-18-s0002.pdf [file JCM.01454-18-s0002.pdf]

|                                    |                      |      |          |
|------------------------------------|----------------------|------|----------|
| <i>mcr-3</i>                       | <i>E. coli</i>       | 4    | KB/human |
| <i>mcr-3</i>                       | <i>E. coli</i>       | 4    | KB/human |
| <i>mcr-3</i>                       | <i>E. coli</i>       | 4    | CF/human |
| <i>mcr-3</i>                       | <i>E. coli</i>       | 4    | CF/human |
| <i>mcr-3</i>                       | <i>E. coli</i>       | 4    | A/animal |
| <i>mcr-3</i>                       | <i>E. coli</i>       | 4    | A/animal |
| <i>mcr-3</i>                       | <i>E. coli</i>       | 2    | A/animal |
| <i>mcr-3</i>                       | <i>E. coli</i>       | 4    | A/animal |
| <i>mcr-3</i>                       | <i>E. coli</i>       | 1    | A/animal |
| <i>mcr-3</i>                       | <i>E. coli</i>       | 4    | A/animal |
| <i>mcr-3</i>                       | <i>E. coli</i>       | 4    | A/animal |
| <i>mcr-3</i>                       | <i>E. coli</i>       | 4    | A/animal |
| <i>mcr-3</i>                       | <i>E. coli</i>       | 4    | A/animal |
| <i>mcr-3</i>                       | <i>E. coli</i>       | 4    | A/animal |
| <i>mcr-3</i>                       | <i>E. coli</i>       | 4    | A/animal |
| <i>mcr-3</i>                       | <i>E. coli</i>       | 2    | A/animal |
| <i>mcr-3</i>                       | <i>E. coli</i>       | 4    | A/animal |
| <i>mcr-4</i>                       | <i>E. coli</i>       | 4    | KB/human |
| <i>mcr-4</i>                       | <i>E. coli</i>       | 4    | KB/human |
| <i>mcr-4</i>                       | <i>E. coli</i>       | 4    | KB/human |
| <i>mcr-4</i>                       | <i>S. oneidensis</i> | 0.5  | KB/human |
| <i>mcr-4</i>                       | <i>S. profunda</i>   | 0.5  | KB/human |
| <i>mcr-5</i>                       | <i>E. coli</i>       | 8    | KB/human |
| <i>mcr-5</i>                       | <i>E. coli</i>       | 8    | KB/human |
| <i>mcr-5</i>                       | <i>Salmonella</i>    | 8    | KB/human |
| <hr/>                              |                      |      |          |
| non-MCR producing strains colistin | <i>E. coli</i>       | 16   | KB/human |
| resistant                          | <i>E. coli</i>       | 16   | KB/human |
|                                    | <i>E. coli</i>       | 4    | KB/human |
|                                    | <i>E. coli</i>       | 16   | KB/human |
|                                    | <i>E. coli</i>       | 4    | CF/human |
|                                    | <i>E. coli</i>       | 4    | CF/human |
|                                    | <i>E. coli</i>       | 16   | CF/human |
|                                    | <i>E. coli</i>       | 8    | CF/human |
|                                    | <i>E. coli</i>       | 8    | CF/human |
|                                    | <i>E. coli</i>       | 8    | CF/human |
|                                    | <i>E. coli</i>       | 16   | CF/human |
|                                    | <i>E. coli</i>       | 4    | CF/human |
|                                    | <i>K. pneumoniae</i> | 8    | KB/human |
|                                    | <i>K. pneumoniae</i> | 32   | KB/human |
|                                    | <i>K. pneumoniae</i> | 16   | KB/human |
|                                    | <i>K. pneumoniae</i> | 16   | KB/human |
|                                    | <i>K. pneumoniae</i> | 32   | KB/human |
|                                    | <i>K. pneumoniae</i> | 32   | KB/human |
|                                    | <i>K. pneumoniae</i> | 32   | CF/human |
|                                    | <i>K. pneumoniae</i> | >=64 | CF/human |
|                                    | <i>K. pneumoniae</i> | >=64 | CF/human |
|                                    | <i>K. pneumoniae</i> | >=64 | CF/human |
|                                    | <i>K. pneumoniae</i> | 32   | CF/human |
|                                    | <i>K. pneumoniae</i> | 8    | CF/human |
|                                    | <i>K. pneumoniae</i> | 8    | CF/human |
|                                    | <i>K. pneumoniae</i> | 16   | CF/human |
|                                    | <i>K. pneumoniae</i> | 16   | CF/human |
|                                    | <i>K. pneumoniae</i> | >=64 | CF/human |
|                                    | <i>K. pneumoniae</i> | >=64 | CF/human |
|                                    | <i>K. pneumoniae</i> | 32   | CF/human |
|                                    | <i>K. pneumoniae</i> | 4    | CF/human |
|                                    | <i>K. pneumoniae</i> | 16   | CF/human |
|                                    | <i>K. pneumoniae</i> | 4    | CF/human |
|                                    | <i>K. pneumoniae</i> | >64  | CF/human |
|                                    | <i>K. pneumoniae</i> | 8    | CF/human |

|                                 |                |          |          |
|---------------------------------|----------------|----------|----------|
| <i>K. pneumoniae</i>            | 16             | CF/human |          |
| <i>K. pneumoniae</i>            | 8              | CF/human |          |
| <i>K. pneumoniae</i>            | 4              | CF/human |          |
| <i>K. pneumoniae</i>            | 4              | CF/human |          |
| <i>K. pneumoniae</i>            | 16             | CF/human |          |
| <i>K. pneumoniae</i>            | >64            | CF/human |          |
| <i>K. pneumoniae</i>            | 8              | CF/human |          |
| <i>K. pneumoniae</i>            | 8              | CF/human |          |
| <i>K. pneumoniae</i>            | 4              | CF/human |          |
| <i>K. pneumoniae</i>            | 8              | CF/human |          |
| <i>K. pneumoniae</i>            | 4              | CF/human |          |
| <i>K. pneumoniae</i>            | 32             | CF/human |          |
| <i>K. pneumoniae</i>            | 16             | CF/human |          |
| <i>K. pneumoniae</i>            | 32             | CF/human |          |
| <i>K. pneumoniae</i>            | 16             | CF/human |          |
| <i>K. pneumoniae</i>            | 16             | CF/human |          |
| <i>K. pneumoniae</i>            | 8              | CF/human |          |
| <i>K. pneumoniae</i>            | 8              | CF/human |          |
| <i>K. pneumoniae</i>            | 8              | CF/human |          |
| <i>E. cloacae</i>               | 16             | KB/human |          |
| <i>E. cloacae</i>               | 16             | CF/human |          |
| <i>E. cloacae</i>               | 16             | CF/human |          |
| <i>E. cloacae</i>               | 32             | CF/human |          |
| <i>E. cloacae</i>               | >=64           | CF/human |          |
| <i>E. cloacae</i>               | >=64           | CF/human |          |
| <i>E. cloacae</i>               | 16             | CF/human |          |
| <i>E. cloacae</i>               | >=64           | CF/human |          |
| <i>E. cloacae</i>               | >=64           | CF/human |          |
| <i>E. cloacae</i>               | 32             | CF/human |          |
| <i>E. cloacae</i>               | >=64           | CF/human |          |
| <i>E. cloacae</i>               | >=64           | CF/human |          |
| <i>E. cloacae</i>               | 8              | CF/human |          |
| <i>E. cloacae</i>               | 8              | CF/human |          |
| <i>E. cloacae</i>               | >64            | CF/human |          |
| <i>C. freundii</i>              | 16             | CF/human |          |
| <i>H. alvei</i>                 | 8              | CF/human |          |
| <i>H. alvei</i>                 | 4              | CF/human |          |
| <i>E. coli</i>                  | 8              | A/animal |          |
| <i>E. coli</i>                  | 8              | A/animal |          |
| <i>E. coli</i>                  | 16             | A/animal |          |
| <i>E. coli</i>                  | 8              | A/animal |          |
| <i>E. coli</i>                  | 8              | A/animal |          |
| <i>E. coli</i>                  | 8              | A/animal |          |
| <i>E. coli</i>                  | 8              | A/animal |          |
| <i>E. coli</i>                  | 16             | A/animal |          |
| <i>E. coli</i>                  | 16             | A/animal |          |
| <i>E. coli</i>                  | 16             | A/animal |          |
| <i>E. coli</i>                  | 8              | A/animal |          |
| <i>E. coli</i>                  | 8              | A/animal |          |
| <i>E. coli</i>                  | 16             | A/animal |          |
| <i>E. coli</i>                  | 16             | A/animal |          |
| <i>E. coli</i>                  | 8              | A/animal |          |
| <i>E. coli</i>                  | 8              | A/animal |          |
| <i>E. coli</i>                  | 16             | A/animal |          |
| <i>E. coli</i>                  | 8              | A/animal |          |
| <i>E. coli</i>                  | 16             | A/animal |          |
| mcr-1 BLSE colistin susceptible | <i>E. coli</i> | <0.5     | A/animal |
| mcr-1 BLSE colistin susceptible | <i>E. coli</i> | < 0.5    | A/animal |
| mcr-3 BLSE colistin susceptible | <i>E. coli</i> | < 0.5    | A/animal |



|                |      |          |
|----------------|------|----------|
| <i>E. coli</i> | <0.5 | A/animal |
| <i>E. coli</i> | <0.5 | A/animal |
| <i>E. coli</i> | <0.5 | A/animal |
| <i>E. coli</i> | <0.5 | A/animal |
| <i>E. coli</i> | <0.5 | A/animal |
| <i>E. coli</i> | <0.5 | A/animal |
| <i>E. coli</i> | <0.5 | A/animal |
| <i>E. coli</i> | <0.5 | A/animal |
| <i>E. coli</i> | <0.5 | A/animal |
| <i>E. coli</i> | <0.5 | A/animal |

---

KB/human : human sample from Hôpital de Bicêtre; CF/human : human sample from CHU  
Clermont-Ferrand ; A/ animal : animal sample from ANSES Lyon
