# Supplementary material for: Development and Multicentric Validation of a Lateral Flow Immunoassay for Rapid Detection of MCR-1-Producing Enterobacteriaceae
Source: PubMed Central journal article supplement (PMC6498016; doi:10.1128/jcm.01454-18), 2019-04-26
Supplement: JCM.01454-18-s0004.pdf [file JCM.01454-18-s0004.pdf]

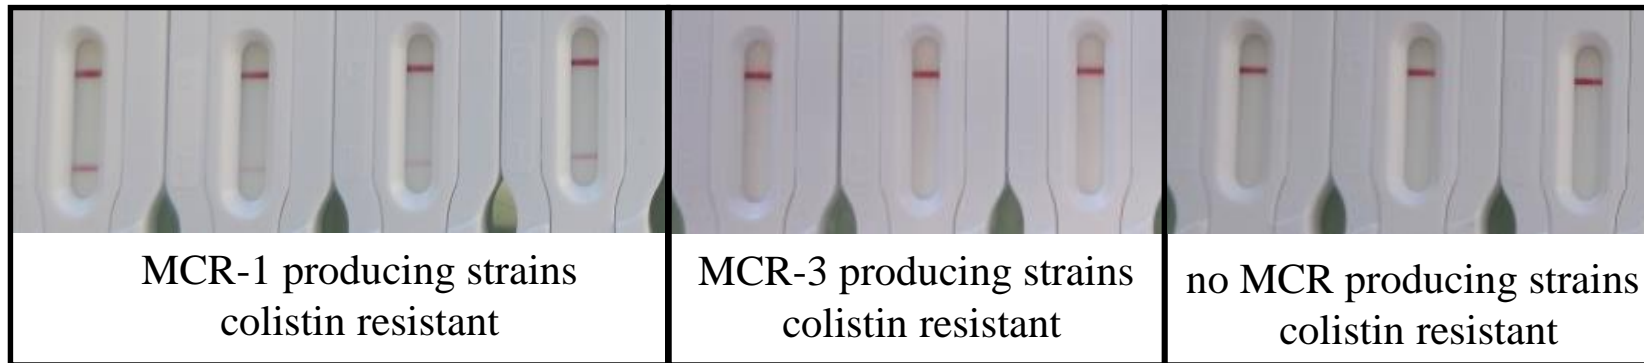

**Supplemental Figure 2:** Results obtained with different isolates
